# Supplementary material
Source: Springer Nature journal article supplement (https://www.springermedizin.de/resource/supplementary/13049_2013_729_MOESM8_ESM.pdf/9667238)
Supplement: MOESM8 [file 9667238]

# Key lessons

|    |                                                                                                                                                                                                                                                                                                                                                                                                                                                                                                                                                                                                                                                                                                                                   |
|----|-----------------------------------------------------------------------------------------------------------------------------------------------------------------------------------------------------------------------------------------------------------------------------------------------------------------------------------------------------------------------------------------------------------------------------------------------------------------------------------------------------------------------------------------------------------------------------------------------------------------------------------------------------------------------------------------------------------------------------------|
| 47 | <p><b>During the pre-hospital emergency medical response to this major incident, were there any particular problems that may be improved in future major incidents?</b></p> <p><input type="radio"/> Yes<br/><input type="radio"/> No</p> <p><i>If yes: In what area/s did the problem/s occur?</i></p> <p><input type="checkbox"/> Issues related to pre-incident situation in the country/region<br/><input type="checkbox"/> Issues related to EMS situation before the major incident<br/><input type="checkbox"/> Nature of the incident itself<br/><input type="checkbox"/> The EMS response<br/><input type="checkbox"/> Characteristics of the patients<br/><input type="checkbox"/> Other – please specify</p>           |
| 48 | <p><b>During the pre-hospital emergency medical response to this major incident, were there any particular successes that may enhance the response to future major incidents?</b></p> <p><input type="radio"/> Yes<br/><input type="radio"/> No</p> <p><i>If yes: In what area/s did the problem/s occur?</i></p> <p><input type="checkbox"/> Issues related to pre-incident situation in the country/region<br/><input type="checkbox"/> Issues related to EMS situation before the major incident<br/><input type="checkbox"/> Nature of the incident itself<br/><input type="checkbox"/> The EMS response<br/><input type="checkbox"/> Characteristics of the patients<br/><input type="checkbox"/> Other – please specify</p> |
